# Supplementary material for: Lignin molecular sieving engineering enables high-plateau-capacity hard carbon anodes for sodium-ion batteries
Source: Royal Society of Chemistry journal article supplement (doi:10.1039/d4gc02019g), 2024-01-01
Supplement: d4gc02019g1.pdf [file d4gc02019g1.pdf]

Supporting Information for

**Lignin molecular sieving engineering enables high-plateau-  
capacity hard carbon anodes for sodium-ion batteries**

Binyi Chen<sup>1</sup>, Lei Zhong<sup>1</sup>, Manjia Lu<sup>1</sup>, Wenbin Jian<sup>1</sup>, Shirong Sun<sup>1</sup>, Qingwei Meng<sup>1,2\*</sup>,

Tiejun Wang<sup>1,2</sup>, Wenli Zhang<sup>1,2,3,4,\*</sup> Xueqing Qiu<sup>1,2</sup>

<sup>1</sup>Guangdong Provincial Key Laboratory of Plant Resources Biorefinery, School of Chemical Engineering and Light Industry, Guangdong University of Technology (GDUT), 100 Waihuan Xi Road, Panyu District, Guangzhou 510006, China

<sup>2</sup>Guangdong Provincial Laboratory of Chemistry and Fine Chemical Engineering Jieyang Center, Jieyang 515200, China

<sup>3</sup>Shaoxing Research Institute of Renewable Energy and Molecular Engineering, Shanghai Jiao Tong University, Shaoxing, 312000, China

<sup>4</sup>Guangdong Basic Research Center of Excellence for Ecological Security and Green Development, Guangdong University of Technology, Guangzhou 510006, China

Corresponding Authors: [qwmeng@gdut.edu.cn](mailto:qwmeng@gdut.edu.cn) (Q.W. Meng); [wlzhang@gdut.edu.cn](mailto:wlzhang@gdut.edu.cn);

[hiteur@163.com](mailto:hiteur@163.com) (W.L. Zhang)



## Supporting Experimental Section

### 1. Experimental

#### 1.1 Materials

Pine lignin was purchased from Zhejiang Jiefa Technology Co., LTD. Ethanol was procured from Macklin, China. Acetone was acquired from Aladdin, China. Ethanol-dissolved lignin (EL), acetone-dissolved lignin (AL), and the residual lignin (RL) were extracted from pine lignin.

#### **Lignin fractionation procedure:**

Pour the dried 20g pine lignin (PL) into a 1000 mL blue-capped bottle and place a rotor. ①Add 500mL ethanol (99.7%) and stir for 12h. After stirring, the solution is filtered to obtain filtrate and filter residue, distillation filtrate by rotary evaporator removes ethanol to produce ethanol-dissolved lignin (EL). Repeat step ① for the remaining filter residue.

Dry the filter residue in ① pour it into a 1000 mL blue-capped bottle and place a rotor. ②Add 500mL acetone (99.5%) and stir for 12h. After stirring, the solution is filtered to obtain filtrate and filter residue, distillation filtrate by rotary evaporator removes acetone to produce acetone-dissolved lignin (AL). Repeat step ② for the remaining filter residue.

The remaining filter residue is dried to obtain residual lignin (RL).

Weigh the mass of EL, AL, and RL and calculate the yield as shown in Table S1.

#### 1.2 Synthesis of hard carbons

The pine lignin (PL) and its graded lignin (EL, AL, and RL) in graphite boats were

put in a tube furnace and purged with nitrogen at a flowing rate of  $80 \text{ cm}^3 \text{ min}^{-1}$  for 30 min. The corresponding hard carbons were obtained after carbonization of the as-prepared lignin in nitrogen at  $1300 \text{ }^\circ\text{C}$  for 6 h (heating ramping rate:  $5 \text{ }^\circ\text{C min}^{-1}$ ). Then the hard carbon materials were mechanically ground into powders.

### *1.3 Materials characterization*

The structural information of lignin was obtained from a Superconducting NMR spectrometer (AVANCE III HD 600 MHz, Bruker, Switzerland). The polar functional groups of lignin were determined by phosphorus spectrum conducted on a Superconducting NMR spectrometer (JNM-ECZ500R/S1 500MHz, JEOL Ltd., Japan). Gel Permeation Chromatography (Waters1515, Waters, USA) was conducted to determine the molecular weight of lignin. The high-temperature synchronous thermal analyzer (STA409PC, NETZSCH, Germany) was used to measure the mass loss during lignin pyrolysis, the specific experimental parameters are as follows, the lignin samples were heated up to  $800 \text{ }^\circ\text{C}$  at a constant heating rate of  $10 \text{ }^\circ\text{C min}^{-1}$  in purified nitrogen (99.99%) with a flow rate of  $80 \text{ mL min}^{-1}$ , and the weight was kept at  $\sim 5 \text{ mg}$ . The scanning electron microscope (SEM) (SU8220, Hitachi, Japan) and transmission electron microscope (TEM) (Talos F200S, FEI Thermo, Czech) were used to capture the morphological characteristics of the samples. The structural parameters of the hard carbon materials were collected on a micro-Raman spectrometer (LabRAM HR Evolution, HORIBA Jobin Yvon, France) using a 532 nm and an X-ray Powder diffractometer (D8-ADVANCE, Bruker, Germany) with a Cu  $K\alpha$  radiation ( $\lambda=0.1541 \text{ nm}$ ). The parameters for open pores were acquired on an adsorption/desorption analyzer

(ASAP2460, Micromeritics, USA). N<sub>2</sub> adsorption/desorption isotherms at 77 K were measured within the range of relative pressures of 10<sup>-3</sup> to 0.998. The small-angle X-ray scattering was performed on a small-angle scatterometer (Xenocs Xeuss, France), and the scattering vector range was 0.001~0.45Å<sup>-1</sup>.

### **Quantitative <sup>31</sup>P NMR spectra analysis:**

#### (1) sample preparation

- ① The lignin sample is dried under vacuum at 80°C for 12 h.
- ② Solvent A configuration: Pyridine-d<sub>5</sub> and Chloroform-d are configured into solvent A according to the volume ratio of 1.6:1.
- ③ Internal standard liquid configuration: 0.018g (m<sub>1</sub>) cyclohexanol is weighed as the internal standard and put into 4 mL small glass bottles; Then 0.005 g (m<sub>2</sub>) of relaxant Chromium(III) acetylacetonate is added, and 1 mL(m<sub>3</sub>) of solvent A is added.
- ④ Sample solution configuration: Weigh 0.03 g (mL) lignin sample, put it into 4 mL glass bottle, add rotor and 0.1 mL (m) internal standard solution; Then add 0.5mL A liquid and shake well, stir overnight, add 0.1mL phosphating agent, shake well and load into the NMR tube for sample delivery.

#### (2) Test conditions:

Model: AVANCE III HD400, manufacturer: Bruker, Switzerland.

Recommended NMR Settings: Pulse Angle :30°; Scanning interval :10s; Signal acquisition :128 times; Width :400ppm; 01P:50ppm.

#### (3) Calculation formula:

$$C = \frac{m_1}{179.17} \times 0.99 \times 1000 \times \frac{m}{m_1 + m_2 + m_3} \times \frac{A}{A_{IS} \times m_L}$$

Where C (nmol/g) is the functional group content, A is the peak area of the functional group, and  $A_{IS}$  is the peak area of the internal standard.

#### *1.4 Electrochemical characterization*

The electrodes were prepared by blade coating technique, i.e. casting the slurry containing 80 wt% hard carbon materials, 10 wt% polyvinylidene difluoride (PVDF, 99.5%, SOLVAY), and 10 wt% carbon black (XC-72R, CABOT) onto copper foil, which was then dried at 80 °C in a vacuum oven for 12h. The average mass loading of active materials was about 1 mg cm<sup>-2</sup>. The electrochemical performance of the hard carbon material electrodes was evaluated in a coin half-cell, in which hard carbon material electrodes and sodium foil were used as working electrodes and counter electrodes, respectively. 1 mol L<sup>-1</sup> NaPF<sub>6</sub> (99.5%, Canrd) in methoxymethane (DME, 99.95%, Canrd) was used as electrolyte. The galvanostatic charge/discharge (GCD) and galvanostatic intermittent titration technique (GITT) tests were conducted on the Neware Battery tester (Neware, China). The cyclic voltammetry (CV) and electrochemical impedance spectroscopy (EIS) were conducted on an electrochemical workstation (VMP3, Bio-Logic, France).

## Supporting Tables

**Table S1** Molecular weight and yield of pine lignin and extracted lignin

| Sample | Mn (Da) | Mw (Da) | PDI  | Yield (%) |
|--------|---------|---------|------|-----------|
| PL     | 2266    | 13723   | 6.05 | —         |
| EL     | 2005    | 5540    | 2.76 | 7.0       |
| AL     | 1933    | 10988   | 5.68 | 20.4      |
| RL     | 2737    | 15931   | 5.81 | 72.6      |

**Table S2** Deconvoluted band assignments of Raman spectra

| Band  | Raman shift (cm <sup>-1</sup> ) | Corresponding structure                                                                   |
|-------|---------------------------------|-------------------------------------------------------------------------------------------|
| G     | ~1580                           | graphitic lattice                                                                         |
| D(D1) | ~1350                           | disordered graphitic lattice                                                              |
| D2    | ~1620                           | few-layer graphene                                                                        |
| D3    | ~1500                           | amorphous structure                                                                       |
| D4    | ~1200                           | sp <sup>2</sup> -sp <sup>3</sup> hybrid structures or<br>C–C/C=C stretching<br>vibrations |

**Table S3** Simulated resistances of HC electrodes

| Sample | Simulated resistances |                       |
|--------|-----------------------|-----------------------|
|        | R <sub>s</sub> (ohm)  | R <sub>ct</sub> (ohm) |
| HC     | 3.78                  | 20.80                 |
| HC-E   | 8.00                  | 15.17                 |
| HC-A   | 4.27                  | 31.45                 |
| HC-R   | 2.46                  | 41.45                 |

## Supporting Figures

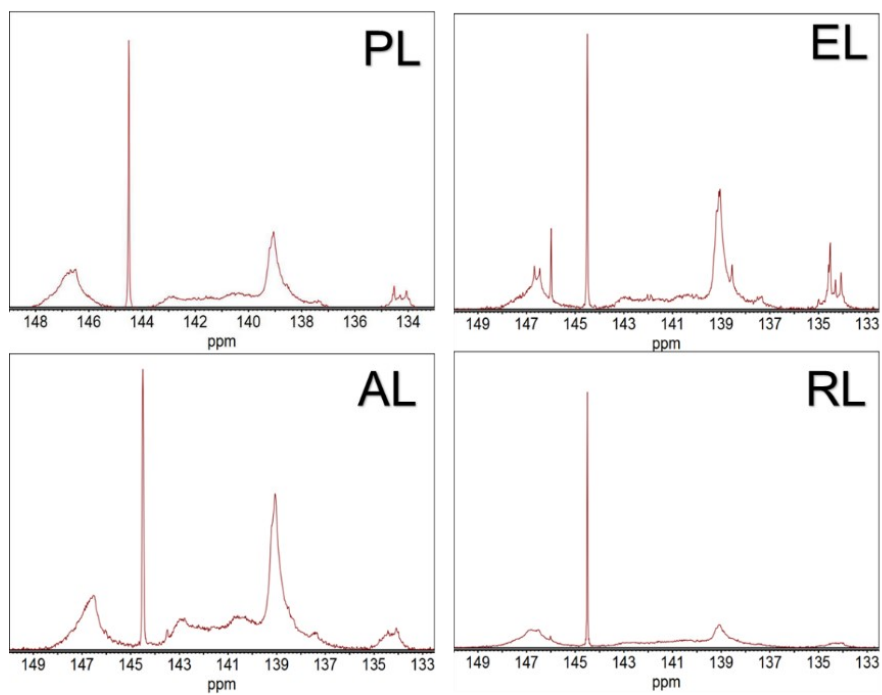

**Figure S1** Quantitative  $^{31}\text{P}$  NMR spectra of PL and extracted lignin.



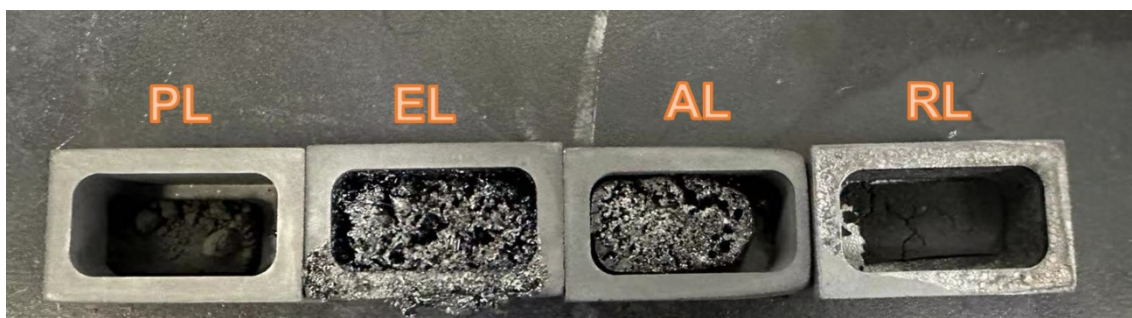

**Figure S2** Digital photos of lignin-derived hard carbon materials.

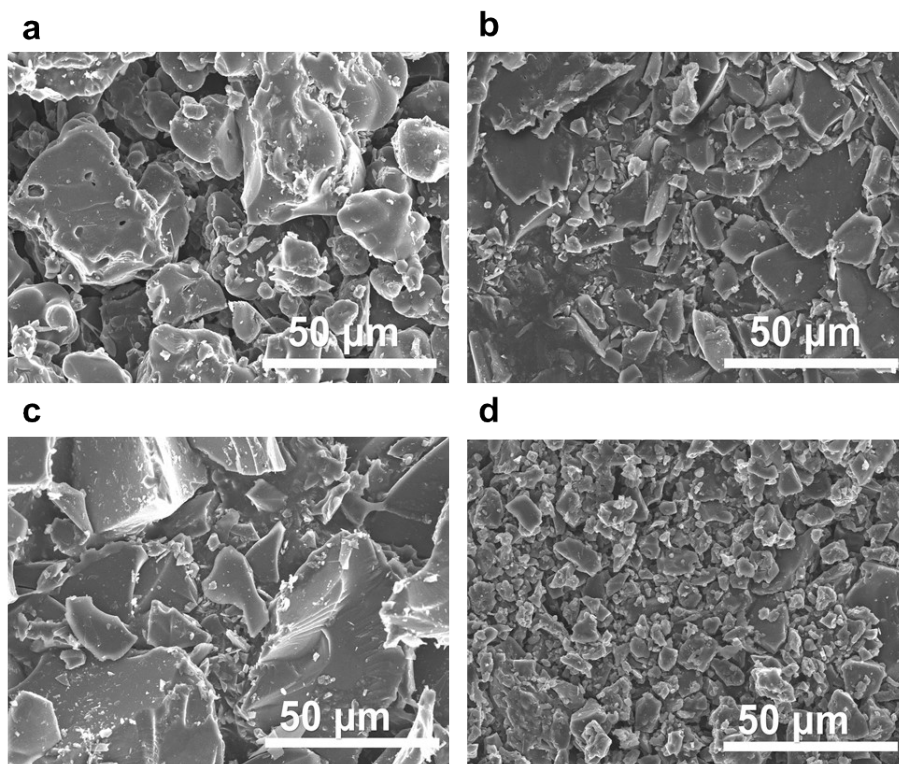

**Figure S3** SEM images of (a) HC; (b) HC-E; (c) HC-A; (d) HC-R.

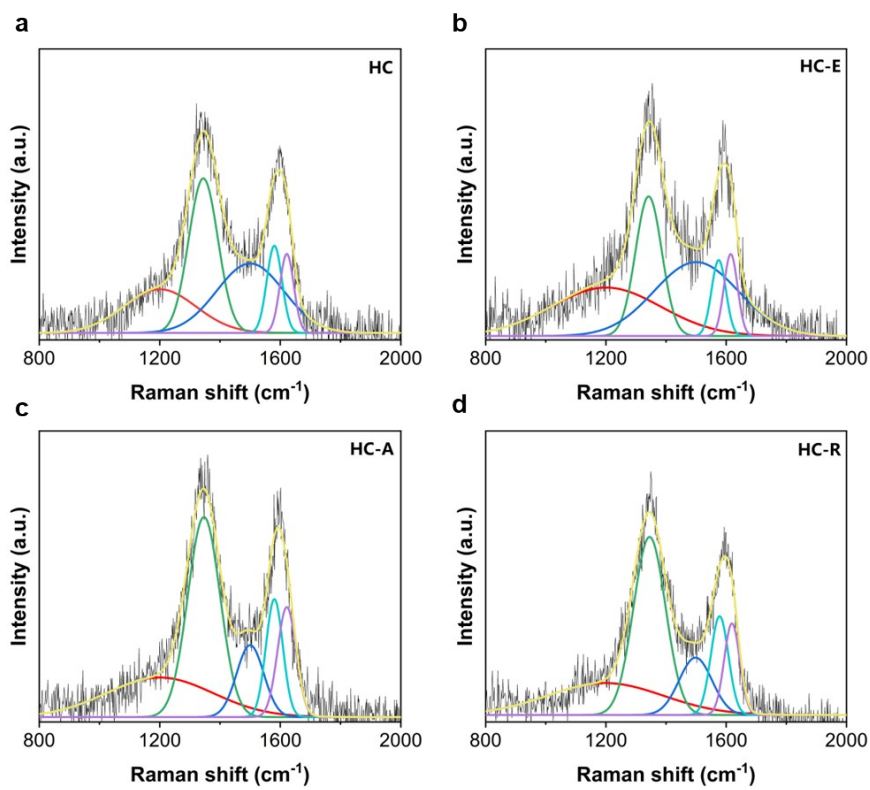

**Figure S4** Raman spectra of (a) HC, (b) HC-E, (c) HC-A, (d) HC-R.

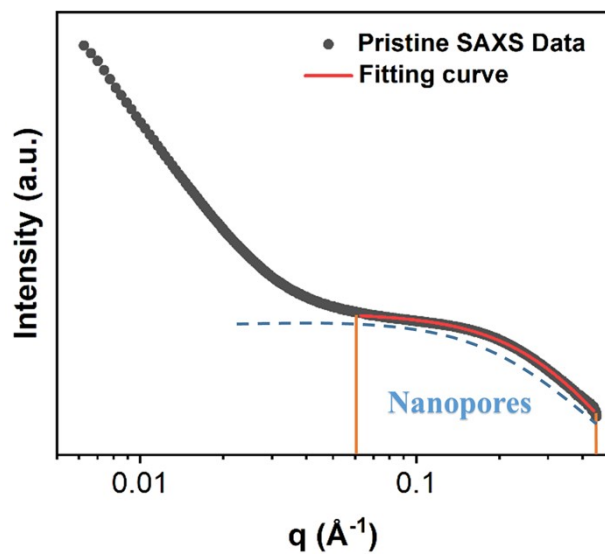

**Figure S5** SAXS profile and fitting curve in the range of 0.06~0.45  $\text{\AA}^{-1}$

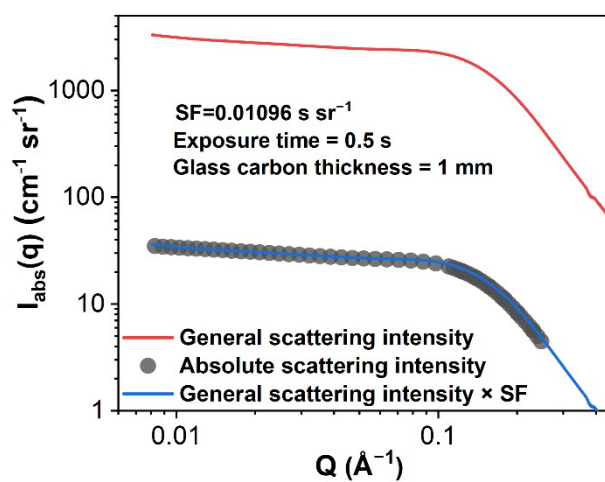

**Figure S6** Scattering profiles of glass carbon and their linear fits. SF is 0.01096  $\text{s sr}^{-1}$ .

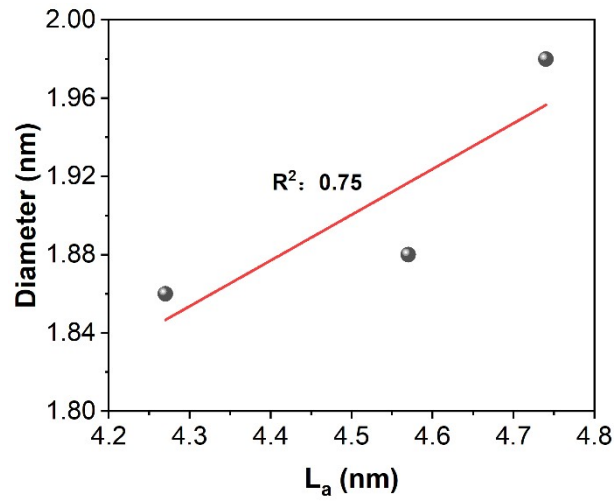

**Figure S7** The relationship of  $L_a$  and the diameter of the closed pore.

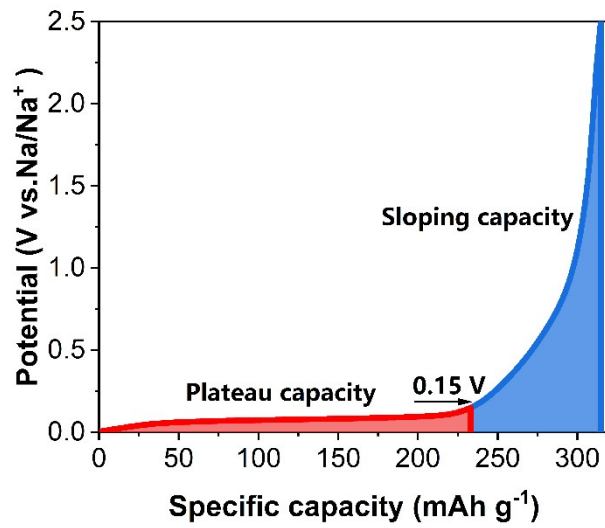

**Figure S8** The composition of sloping capacity and plateau capacities.

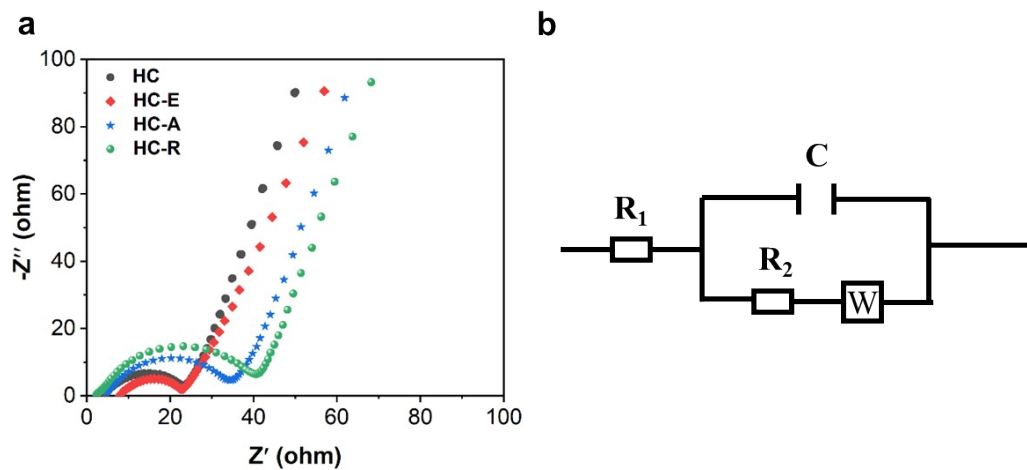

**Figure S9** (a) Nyquist plot of the 5<sup>th</sup> cycle, (b) The corresponding equivalent circuit of (de-)sodiation process of HC.

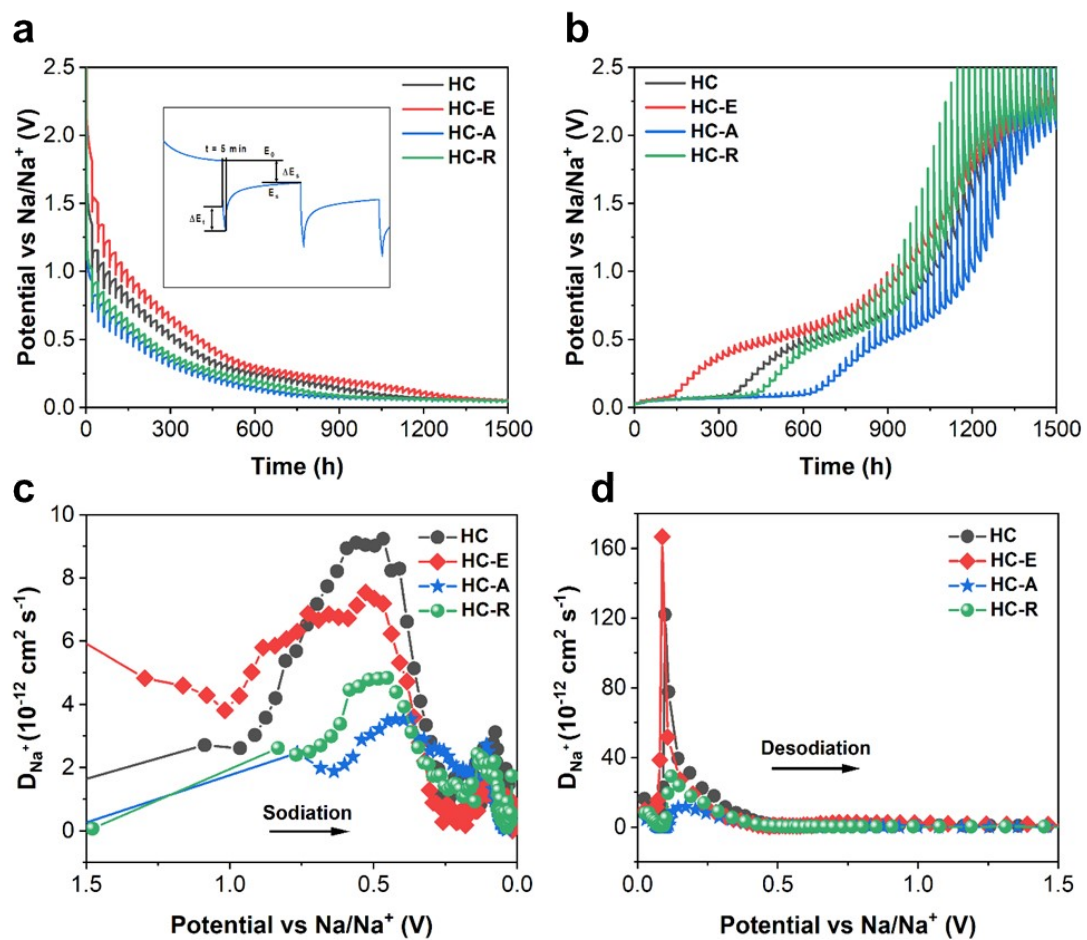

**Figure S10** The GITT profiles of the (a) discharge and (b) charge process, Na<sup>+</sup>-ion diffusion coefficients calculated from GITT profiles of hard carbons during (c) sodiation and (d) desodiation.

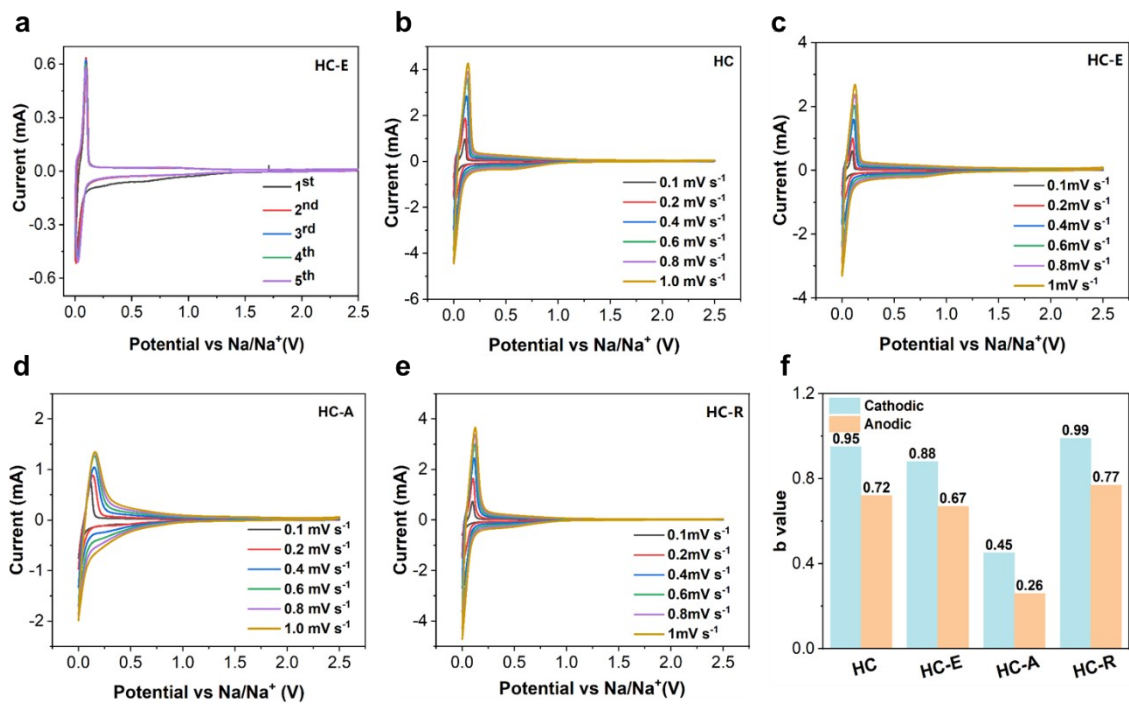

**Figure S11** (a) CV profiles collected at 0.1 mV s<sup>-1</sup> and 0.001–2.5 V from HC-E, CV curves of LDHC at various scan rates, (b) HC; (c) HC-E; (d) HC-A; (e) HC-R, (f) *b* values of LDHC.
